# Supplementary material for: Green Synthesized Silver Nanoparticles Immobilized on Activated Carbon Nanoparticles: Antibacterial Activity Enhancement Study and Its Application on Textiles Fabrics
Source: MDPI journal article supplement (doi:10.3390/molecules26133790), 2021-06-22
Supplement: s1 [file s1]

Supplementary Material

# Green Synthesized Silver Nanoparticles Immobilized on Activated Carbon Nanoparticles: Antibacterial Activity Enhancement Study and Its Application on Textiles Fabrics

Pratama Jujur Wibawa <sup>1,\*</sup>, Muhammad Nur <sup>2</sup>, Mukhammad Asy'ari <sup>1</sup>, Wijanarka Wijanarka <sup>3</sup>, Heru Susanto <sup>4</sup>, Heri Sutanto <sup>2</sup> and Hadi Nur <sup>5</sup>

<sup>1</sup> Department of Chemistry, Faculty of Sciences and Mathematics, Diponegoro University, Jalan Prof. H. Soedarto, SH. No.1 Tembalang, Semarang, 50275, Indonesia; asyari@live.undip.ac.id

<sup>2</sup> Department of Physics, Faculty of Sciences and Mathematics, Diponegoro University, Jalan Prof. H. Soedarto, SH. No.1 Tembalang, Semarang, 50275, Indonesia; mnur@lecturer.undip.ac.id (M.N.); herisutanto@live.undip.ac.id (H.S.)

<sup>3</sup> Department of Biology, Faculty of Sciences and Mathematics, Diponegoro University, Jalan Prof. H. Soedarto, SH. No.1 Tembalang, Semarang, 50275, Indonesia; Wijanarka@lecturer.undip.ac.id

<sup>4</sup> Department of Chemical Engineering, Faculty of Engineering, Diponegoro University, Jalan Prof. H. Soedarto, SH. No.1 Tembalang, Semarang, 50275, Indonesia; herususanto@lecturer.undip.ac.id

<sup>5</sup> Center for Sustainable Nanomaterials, Inbu Sina Institute for Scientific and Industrial Research, Universiti Teknologi Malaysia, Skudai 81310, Johor, Malaysia; and Central Laboratory of Minerals and Advanced Materials, Faculty of Mathematica and Natural Sciences, State University of Malang, Malang, 65145, Indonesia; hadinur@utm.my

\* Correspondence: pratamajw@live.undip.ac.id

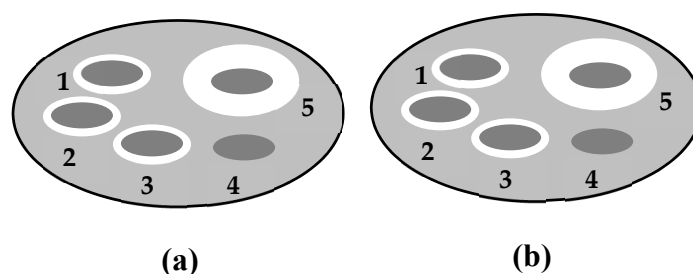

**Figure S1.** Schematic illustration of the antibacterial properties test of the fabricated ACNPs, AgNPs, and AgNPs-immobilized ACNPs. (a). Petri dish loaded with *E. coli* bacterial solid culture, (b). Petri dish loaded with *S. aureus* bacterial solid culture, (1). Whatman filter paper wetted with ACNPs, (2) that soaked with AgNPs, (3) flowed with AgNPs-immobilized ACNPs, (4). Whatman filter paper washed with distilled water (negative control), no clear zone generated, (5). Whatman filter paper wetted with antibiotic amoxicillin (positive control) with the broadest clear area. A clear spot with various wide was generated around samples 1, 2, and 3.

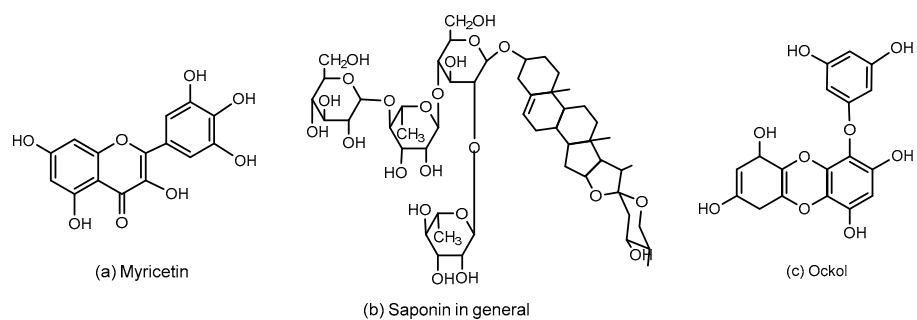

**Figure S2.** Representative molecular structure of (a) flavonoid<sup>41</sup>, (b) saponin<sup>42–43</sup>, and (c) tannin<sup>44</sup>.

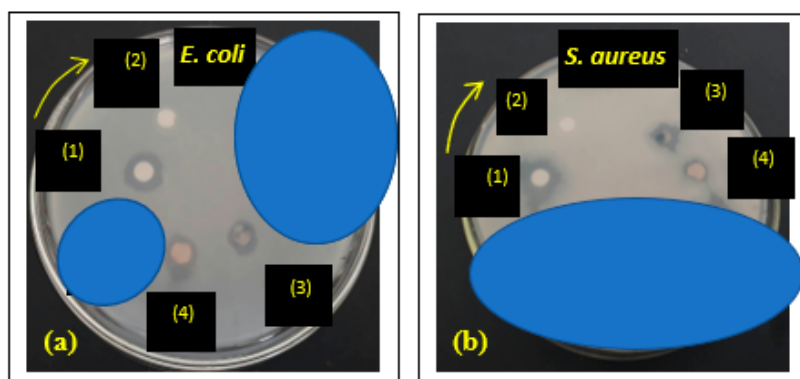

**Figure S3.** Antibacterial activity test towards (a) *E. coli*, (b) *S. aureus*. Here (1). Amoxicillin antibiotic (positive control), (2) Distilled water (negative control), (3). AgNPs-immobilized ACNPs; (4). AgNPs.

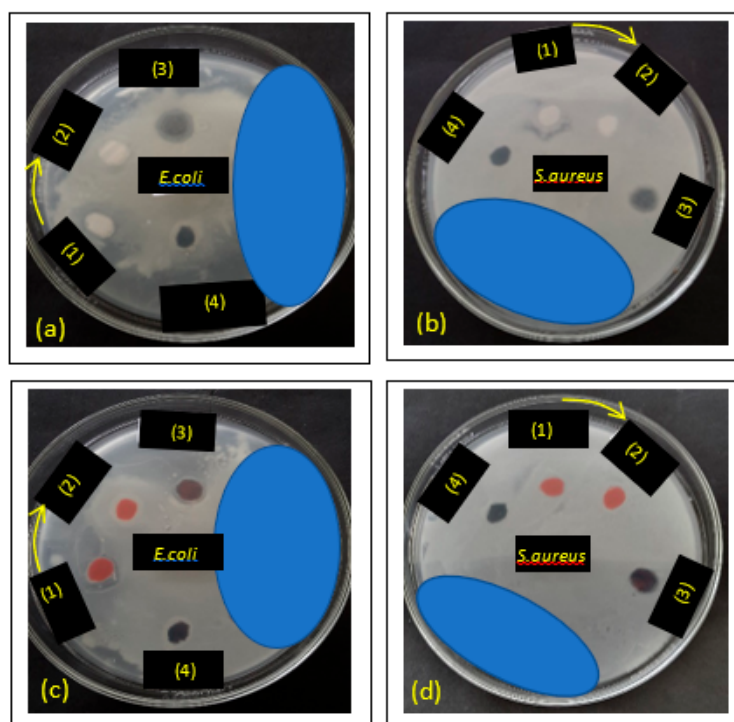

**Figure S4.** Antibacterial activity test for cotton fabrics towards (a) *E. coli*; (b) *S. aureus*; and polyester fabrics towards (c) *E. coli*; (d) *S. aureus*. Here, (1). Wetted with amoxiciline (positive control); (2). Wetted with distilled water (negative control); (3). Wetted with AgNPs-incorporated ACNPs of 5% w/v in concentration; (4). Wetted with ACNPs of 5% w/v in concentration.

**Table S1.** Assignment of the synthesized AgNPs FTIR spectra, in detail.

| FTIR spectra                      |                  | Represented Atomic Bonds Vibration | References Number |
|-----------------------------------|------------------|------------------------------------|-------------------|
| Wavenumber Peaks/cm <sup>-1</sup> | References       |                                    |                   |
| 3843                              | 3744–3943        | free O-H stretching of water vapor | [40]              |
| 3372                              | 3431             | bonded O-H stretching of phenol    | [38,39]           |
|                                   | 3427–3436        | bonded O-H stretching              | [36]              |
|                                   | 3423,15          | free O-H stretching of phenol      | [37]              |
|                                   | 3420,77          | free O-H stretching of alcohol     | [37]              |
| 2925                              | 2922             | C-H aliphatic stretching           | [38,39]           |
| 1742                              | 1744             | C=O stretching                     | [36,38,39]        |
| 1623                              | 1630,32; 1631,43 | C=C aromatics stretching           | [37]              |
| 1312                              | 1375             | N-O stretching                     | [38,39]           |
| 1033                              | 1034             | C-O stretching                     | [36]              |
| 605                               | 616–672, 522–575 | C-C aliphatic bending              | [36]              |
|                                   | 593–630          | N=O stretching                     | [40]              |

**Table S2.** Completely summary of the clear zone generated around the textile fabric disks, which wetted with the stated materials and positioned on *E. coli* and *S. aureus*'s bacterial culture.

| Textile Fabrics Wetted With Materials of 1% w/v in Concentration |                                    | Clear Zone     |                           |                  |                            |
|------------------------------------------------------------------|------------------------------------|----------------|---------------------------|------------------|----------------------------|
|                                                                  |                                    | <i>E. coli</i> |                           | <i>S. aureus</i> |                            |
|                                                                  |                                    | Radius/mm      | % Antibacterial Activity* | Radius/mm        | % Antibacterial Activity * |
| Cotton                                                           | ACNPs                              | 0              | 0                         | 0                | 0                          |
|                                                                  | AgNPs-immobilized ACNPs            | 0              | 0                         | 0                | 0                          |
|                                                                  | Amoxicillin (positive control)     | 70             | 21                        | 180              | 55.73                      |
|                                                                  | Distilled water (negative control) | 0              | 0                         | 0                | 0                          |
| Polyester                                                        | ACNPs                              | 0              | 0                         | 0                | 0                          |
|                                                                  | AgNPs-immobilized ACNPs            | 0              | 0                         | 0                | 0                          |
|                                                                  | Amoxicillin (positive control)     | 323            | 100                       | 204              | 63.16                      |
|                                                                  | Distilled water (negative control) | 0              | 0                         | 0                | 0                          |

\* % Antibacterial activity = (Clear zone generated around the material tested ÷ The most expansive clear area developed around positive control) × 100 %

| Textile fabrics wetted with materials of 5% w/v in concentration |                                    | Clear Zone     |                            |                  |                            |
|------------------------------------------------------------------|------------------------------------|----------------|----------------------------|------------------|----------------------------|
|                                                                  |                                    | <i>E. coli</i> |                            | <i>S. aureus</i> |                            |
|                                                                  |                                    | Radius/mm      | % Antibacterial Activity * | Radius/mm        | % Antibacterial Activity * |
| Cotton                                                           | ACNPs                              | 0              | 0                          | 0                | 0                          |
|                                                                  | AgNPs-immobilized ACNPs            | 2.00           | 19.23                      | 1.40             | 13.36                      |
|                                                                  | Amoxicillin (positive control)     | 10.40          | 100                        | 8.50             | 81.73                      |
|                                                                  | Distilled water (negative control) | 0              | 0                          | 0                | 0                          |
| Polyester                                                        | ACNPs                              | 0              | 0                          | 0                | 0                          |
|                                                                  | AgNPs-immobilized ACNPs            | 3.30           | 31.73                      | 2.20             | 21.15                      |
|                                                                  | Amoxicillin (positive control)     | 8.30           | 79.81                      | 7.90             | 75.96                      |
|                                                                  | Distilled water (negative control) | 0              | 0                          | 0                | 0                          |

\* % Antibacterial activity = (Clear zone generated around the material tested ÷ The most expansive clear area developed around positive control) × 100 %

| Textile fabrics wetted with materials of 10% w/v in concentration |                                    | Clear zone     |                           |                  |                           |
|-------------------------------------------------------------------|------------------------------------|----------------|---------------------------|------------------|---------------------------|
|                                                                   |                                    | <i>E. coli</i> |                           | <i>S. aureus</i> |                           |
|                                                                   |                                    | Radius/mm      | % Antibacterial activity* | Radius/mm        | % Antibacterial activity* |
| Cotton                                                            | ACNPs                              | 0              | 0                         | 0                | 0                         |
|                                                                   | AgNPs-immobilized ACNPs            | 0.00           | 0.00                      | 0.00             | 0.00                      |
|                                                                   | Amoxicillin (positive control)     | 204            | 63.16                     | 323              | 100                       |
|                                                                   | Distilled water (negative control) | 0              | 0                         | 0                | 0                         |
| Polyester                                                         | ACNPs                              | 0              | 0                         | 0                | 0                         |
|                                                                   | AgNPs-immobilized ACNPs            | 0.00           | 0.00                      | 0.00             | 0.00                      |
|                                                                   | Amoxicillin (positive control)     | 255            | 78.95                     | 100              | 30.96                     |
|                                                                   | Distilled water (negative control) | 0              | 0                         | 0                | 0                         |

\* % Antibacterial activity = (Clear zone generated around the material tested ÷ The most expansive clear area developed around positive control) × 100 %
